# Supplementary material for: Carbon–TiO2 composites as high-performance supercapacitor electrodes: synergistic effect between carbon and metal oxide phases
Source: Royal Society of Chemistry journal article supplement (doi:10.1039/c7ta08023a), 2017-11-27
Supplement: c7ta08023a1.pdf [file c7ta08023a1.pdf]

### Supporting Information

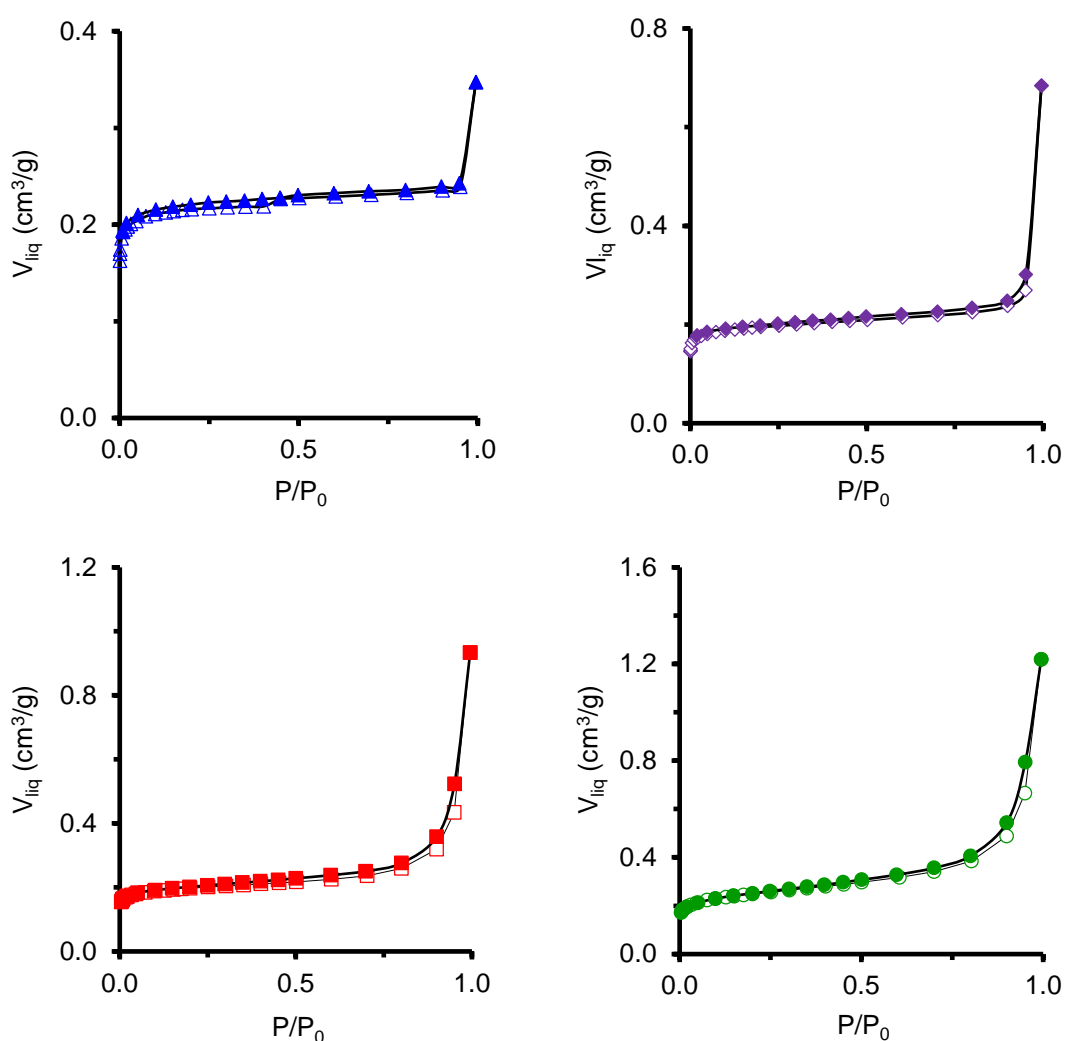

Figure S1.  $\text{N}_2$  adsorption-desorption isotherms at  $-196\text{ }^\circ\text{C}$  on samples: CTi10  $\blacktriangle$ , CTi20  $\blacklozenge$ , CTi30  $\blacksquare$  and CTi40  $\bullet$ . Closed symbols: Desorption branch and opened symbols: Adsorption branch.

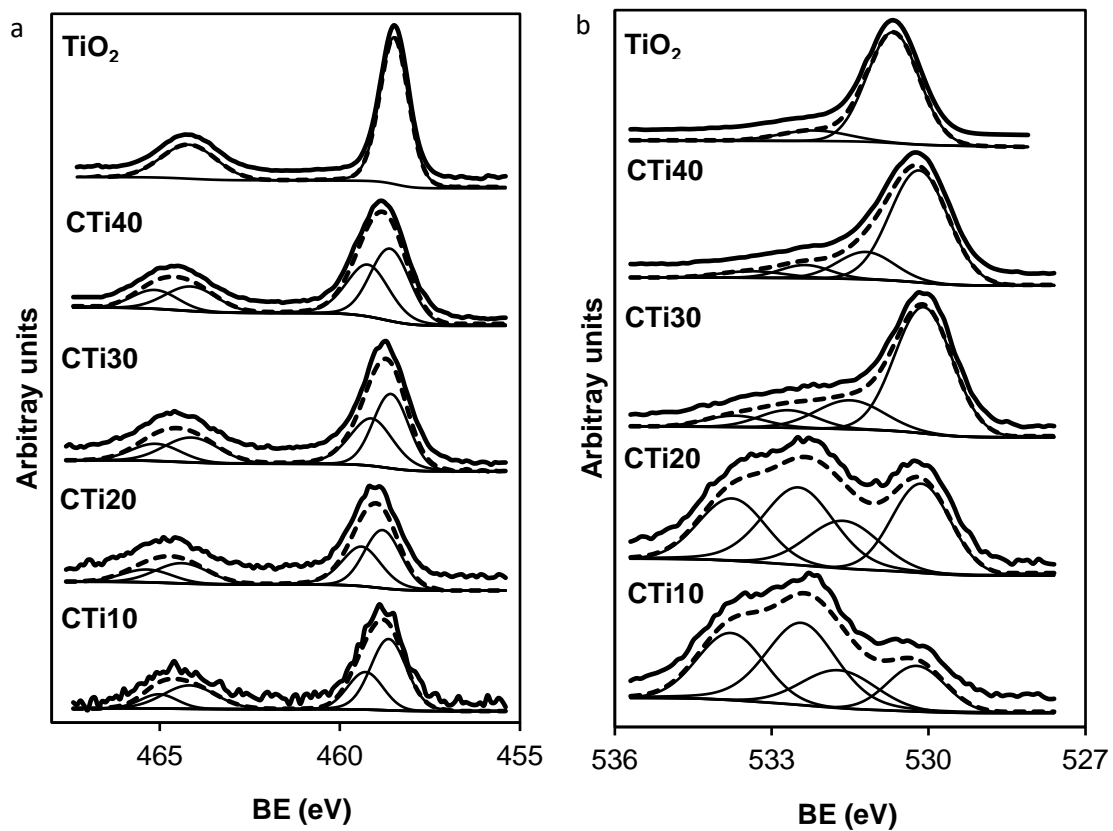

Figure S2. XPS spectra of  $\text{TiO}_2$ -Carbon composites, a)  $\text{Ti}_{2p}$  and b)  $\text{O}_{1s}$  regions.
